# Supplementary material
Source: MDPI journal article supplement (https://www.mdpi.com/2073-4395/12/9/2167)

**Figure S1.** Variability of total rainfall (mm), and average temperature average (°C), according to the meteorological station (Tourmaline, MG), from first five harvests (first (H1), second (H2), third (H3), fourth (H4) and fifth harvest (H5)).

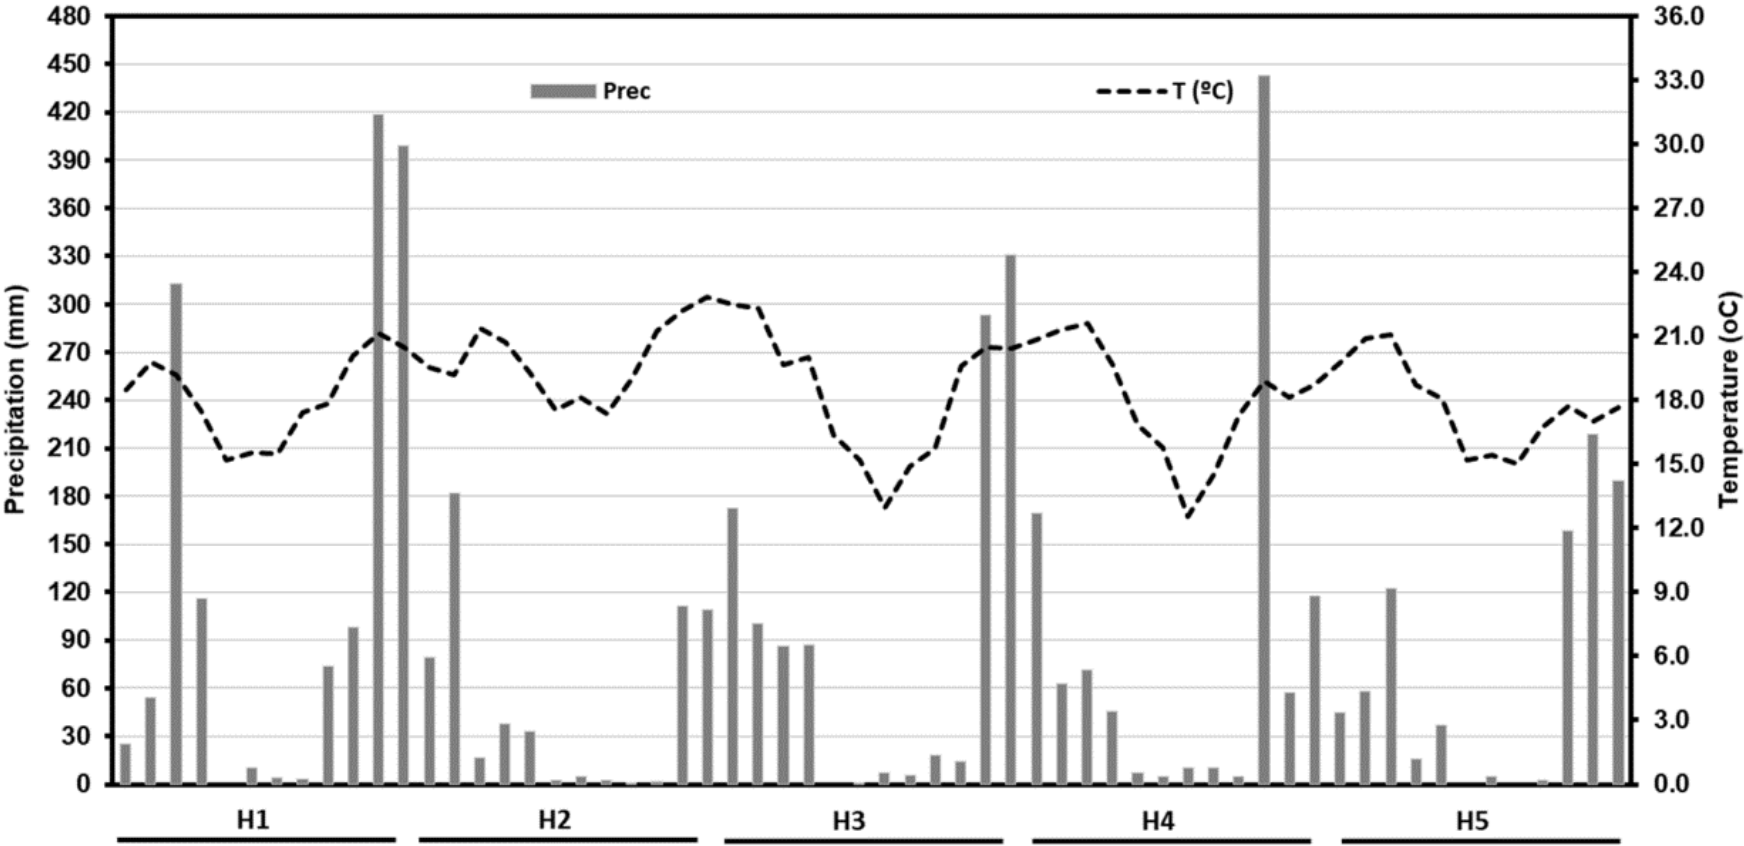

Supplement: s1 [file s1 › Supplementary Materials.pdf]
