# Supplementary material
Source: MDPI journal article supplement (https://www.mdpi.com/2073-4395/12/9/2167)
Supplement: s1 [file s1 › Supplementary Materials.xlsx]

## Sheet: Sheet1
Table S1. Genotypic correlation matrix (r) among leaf water potential (Ѱpd), net photosynthetic rate (A), stomatal conductance (gs), transpiration (E), leaf area (LA), stem diameter (SD), number of plagiotropic branches (NPB), root dry mass (RM), total mass (TM ), shoot dry mass (SM), cuticle thickness (CT), leaf blade thickness (LBT), thickness of the spongy parenchyma (TSP), the ratio of the po…
	A	gs	E	LA	SD	NPB	RM	TM	SM	CT	LBT	TSP	DPED	NXV	PT	H1	H2	H3	H4	H5	PROD
ѰPD	0.51	0.29	0.24	-0.77t	-0.52	-0.47	-0.24	-0.73t	-0.66*	0.33	-0.11	-0.17	-0.34	-0.45	-0.41	-0.63*	0.21	-0.47	-0.44	0.41	-0.02
A		0.85 t	0.89 t	-0.77 t	-0.28	-0.29	0.05	-0.57	-0.72*	0.44	0.18	0.07	-0.68*	-0.70*	-0.6	-0.45	0.4	-0.21	-0.09	0.46	0.28
gs			0.92 t	-0.58	-0.1	-0.01	0.22	-0.62*	-0.63*	0.56	0.29	0.2	-0.42	-0.84 t	-0.75 t	-0.18	0.3	-0.24	0.02	0.24	0.17
E				-0.51	-0.11	0.05	0.27	0.65*	-0.53	0.42	0.41	0.31	-0.48	-0.82 t	-0.77 t	-0.32	0.42	-0.21	0.1	0.32	0.27
LA					0.66*	0.72*	0.41	0.91t	0.90 t	-0.65*	-0.04	0.04	0.48	0.46	0.39	0.48	-0.11	0.35	0.39	-0.3	0.06
SD						0.51	0.84 t	0.88t	0.67*	-0.28	0.05	-0.03	-0.03	0.1	0.23	0.3	-0.1	0.61*	0.19	0.18	0.36
NPB							0.53	0.67*	0.54	-0.54	-0.04	0.03	0.36	-0.17	-0.25	0.35	0.34	0.01	0.54	-0.13	0.25
RM								0.91t	0.4	-0.13	0.2	0.08	-0.23	-0.22	-0.15	0.06	-0.03	0.29	0.31	0.15	0.29
SM										-0.52	0.07	0.13	0.42	0.51	0.49	0.48	-0.06	0.43	0.36	-0.2	0.15
CT											0.41	0.3	0	-0.43	-0.38	-0.07	-0.07	0.04	-0.19	0.17	0.03
LBT												0.97 t	0.01	-0.39	-0.41	-0.34	0.01	-0.18	-0.17	0.05	-0.12
TSP													0.14	-0.33	-0.38	-0.27	0.05	-0.28	-0.12	-0.07	-0.19
DPED														0.18	0.02	0.47	0.13	0.13	0.28	-0.25	0.06
NXV															0.96 t	0.42	-0.53	0.35	0.14	-0.47	-0.27
PT																0.41	-0.55	0.44	0.02	-0.34	-0.2
H1																	-0.11	0.42	0.64	-0.5	0.1
H2																		0.01	0.27	0.56	0.75 t
H3																			0.18	0.36	0.64*
H4																				-0.38	0.3
H5																					0.73 t
t,* Significant at 1% or 5% probability according to t-test
